# Supplementary material for: Individual and Structural Factors of E-Commerce Adoption in Latin America: An Analysis During the Pandemic Period
Source: Research Square preprint supplement (doi:10.21203/rs.3.rs-6550525/v1), 2025-05-13
Supplement: Supplementary file 1 [file a7cd52d2216102b34589fb7e.docx]

**Highlights**

- E-commerce adoption in Latin America varies due to individual and structural factors.
- Trust and social media use significantly impact individual e-commerce adoption.
- Market size, infrastructure, and consumption capacity shape national e-commerce usage.
- A multilevel analysis integrates individual and country-level predictors of adoption.
- Structural conditions explain the intensity of e-commerce usage across countries.
